# Supplementary material for: Dye sensitized solar cell with lawsone dye using a ZnO photoanode: experimental and TD-DFT study
Source: Royal Society of Chemistry journal article supplement (doi:10.1039/c4ra14620d), 2015-01-01
Supplement: c4ra14620d1.pdf [file c4ra14620d1.pdf]

January 27, 2015

**Supporting Information: (one page)**

**Manuscript ID:** RA-ART-11-2014-014620

**Title:** Dye Sensitized Solar Cell With Lawsone Dye Using ZnO Photoanode:  
Experimental and TD-DFT Study.

**Authors:** Shubhangi S. Khadtare, Anuja P. Ware, Sunita Salunke-Gawali, Sandesh R. Jadkar,  
Subhash S. Pingale\* and Habib M. Pathan\*.

**Supporting Information**

**Table S1:** Theoretical UV-Vis absorption wavelengths of hydrogen-bonded lawsone with explicit ethanol molecule in ethanol calculated at TD/C-PCM/PBE1PBE/6-311+G(d,p) level of DFT. (H:HOMO, L:LUMO). The f values are oscillator strengths.

| <b>Lawsone with Explicit ethanol</b> |                |        |
|--------------------------------------|----------------|--------|
|                                      | $\lambda$ (nm) | f      |
| 1.                                   | 289.6          | 0.3014 |
| 2.                                   | 332.7          | 0.0914 |
| 3.                                   | 400.4          | 0.0097 |
| 4.                                   | 409.6          | 0.0000 |

**Table S2:** Theoretical UV-Vis absorption wavelengths of a hydrogen-bonded lawsone dimer in ethanol calculated at TD/C-PCM/PBE1PBE/6-311+G(d,p) level of DFT. (H:HOMO, L:LUMO). The f values are oscillator strengths.

| <b>Lawsone dimer</b> |                |        |
|----------------------|----------------|--------|
|                      | $\lambda$ (nm) | f      |
| 1.                   | 291.7          | 0.3701 |
| 2.                   | 305.3          | 0.0011 |
| 3.                   | 322.8          | 0.0031 |
| 4.                   | 331.6          | 0.0957 |
| 5.                   | 337.0          | 0.0743 |
| 6.                   | 352.7          | 0.0057 |
| 7.                   | 392.3          | 0.0109 |
| 8.                   | 394.9          | 0.0227 |
| 9.                   | 397.3          | 0.0000 |
| 10.                  | 407.6          | 0.0000 |
